# Supplementary material for: The Development, Function, and Plasticity of the Immune Macroenvironment in Cancer
Source: bioRxiv or medRxiv preprint supplement (doi:10.1101/805473), 2019-10-16

**Extended Data Fig. 1: Systemic immunity is distinctly remodeled across tumor types.**

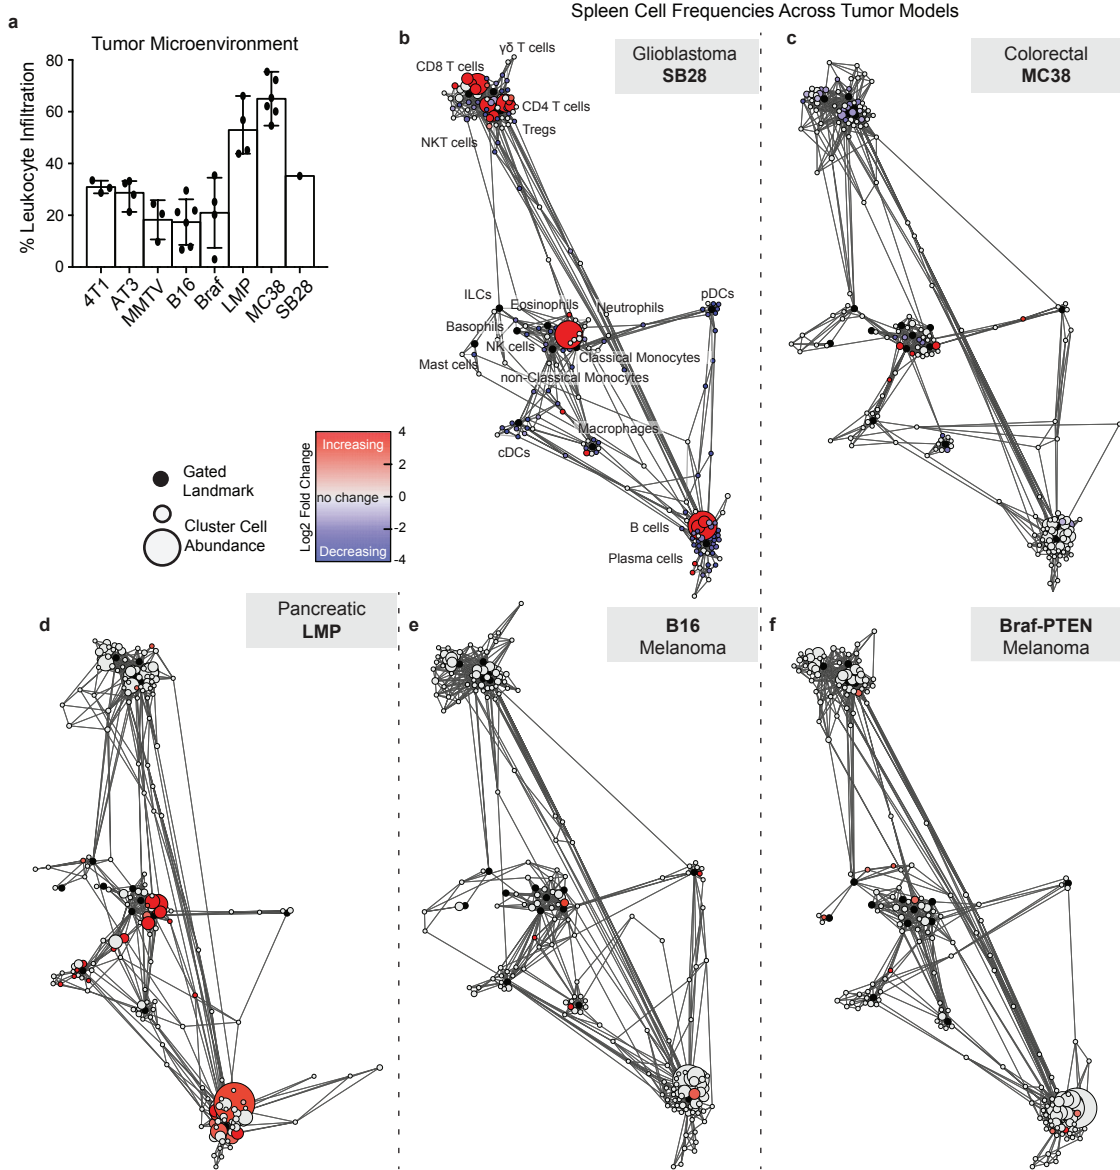

**Extended Fig. 2: Systemic immunity is distinctly remodeled over tumor development.**

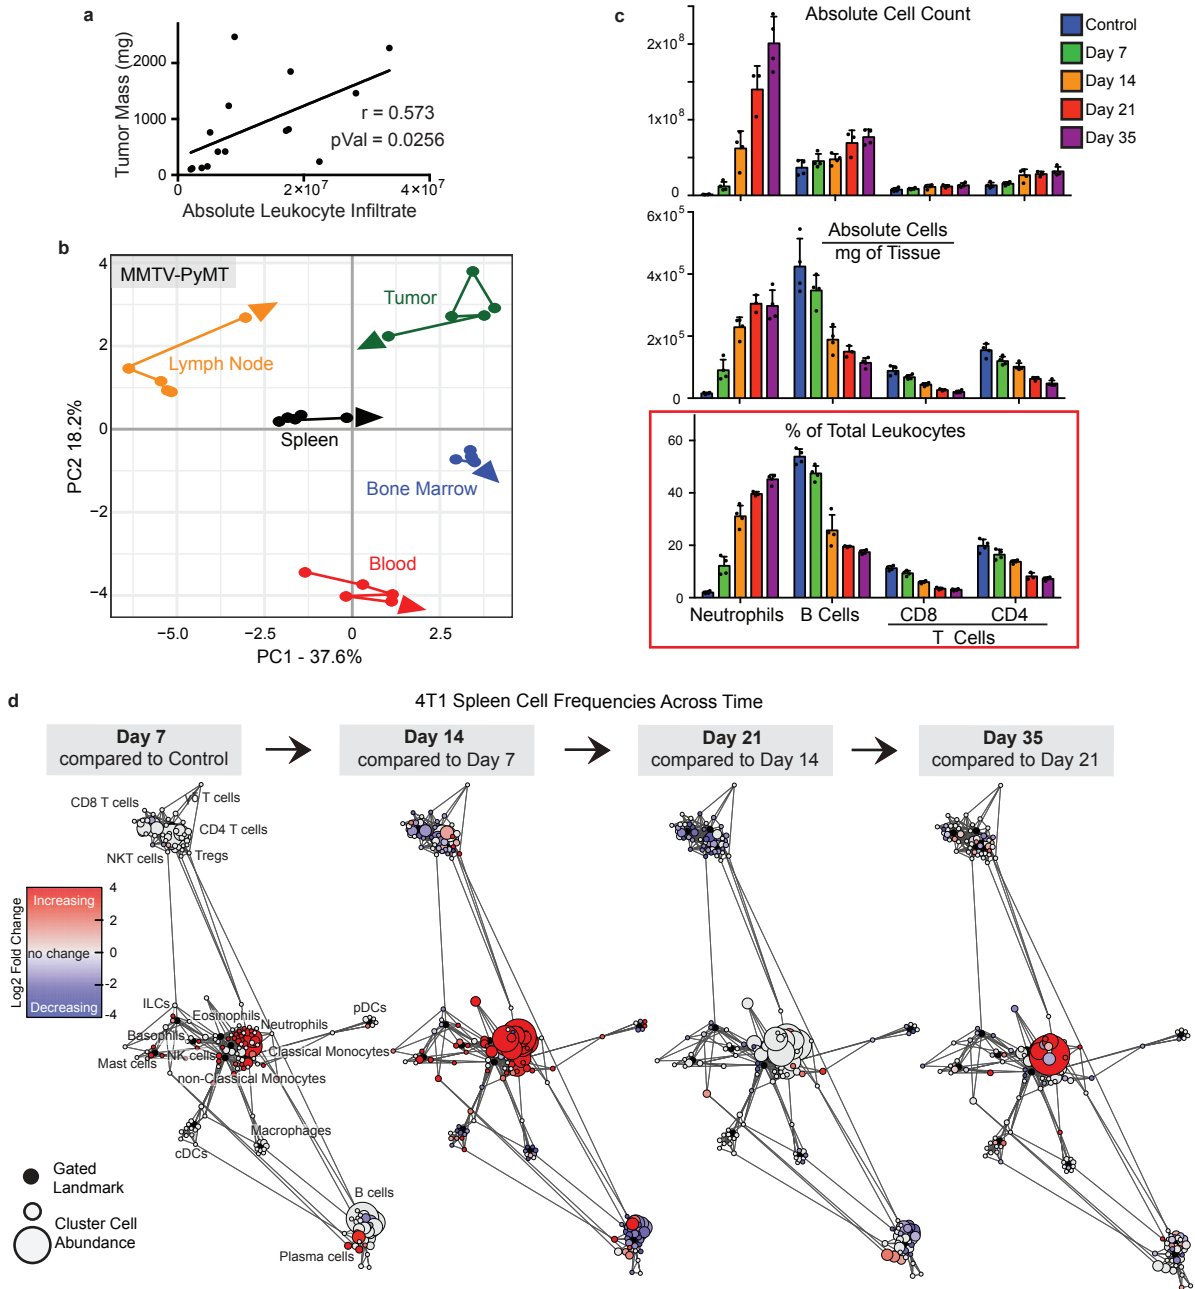

**Extended Fig. 3: Immunity is distinctly remodeled by compartment over tumor development.**

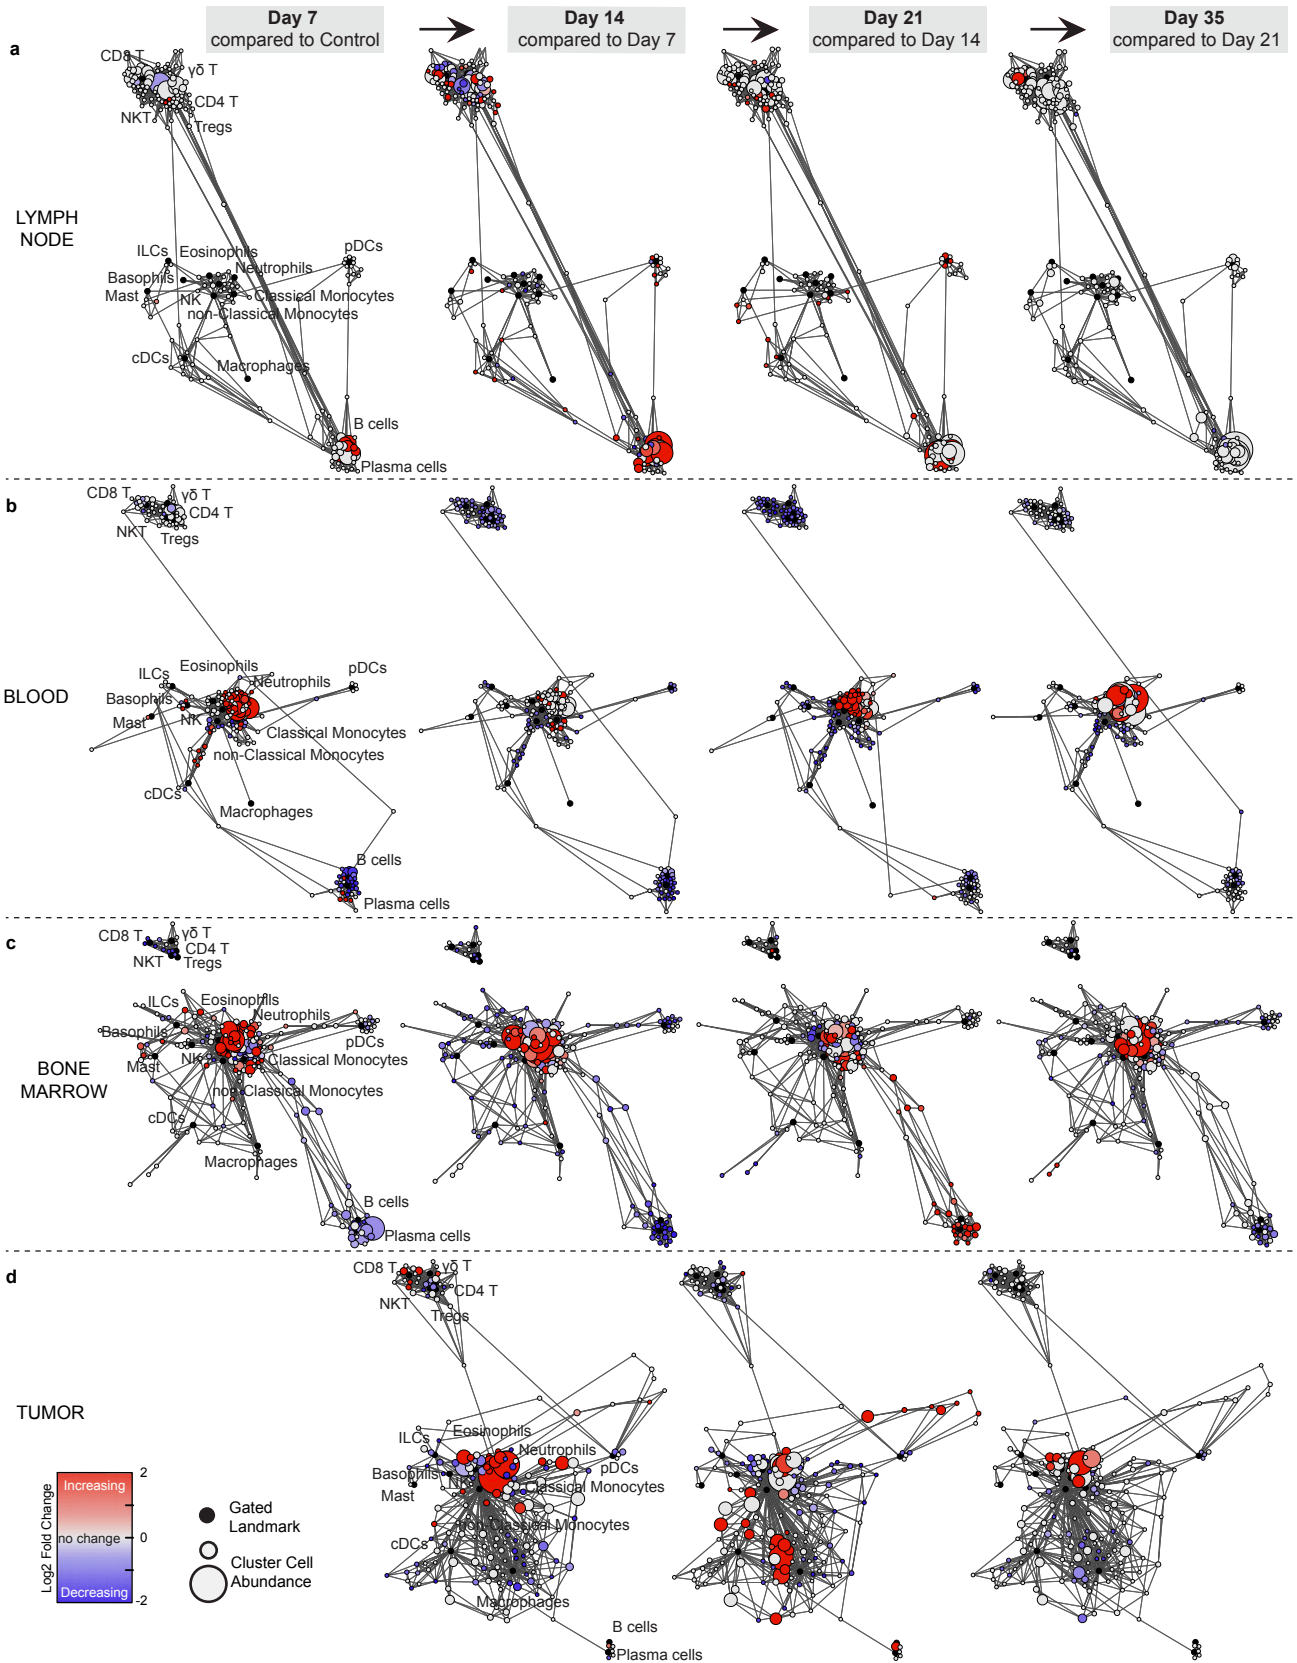

**Extended Fig. 4: Tumor growth shifts the systemic T cell composition across models.**

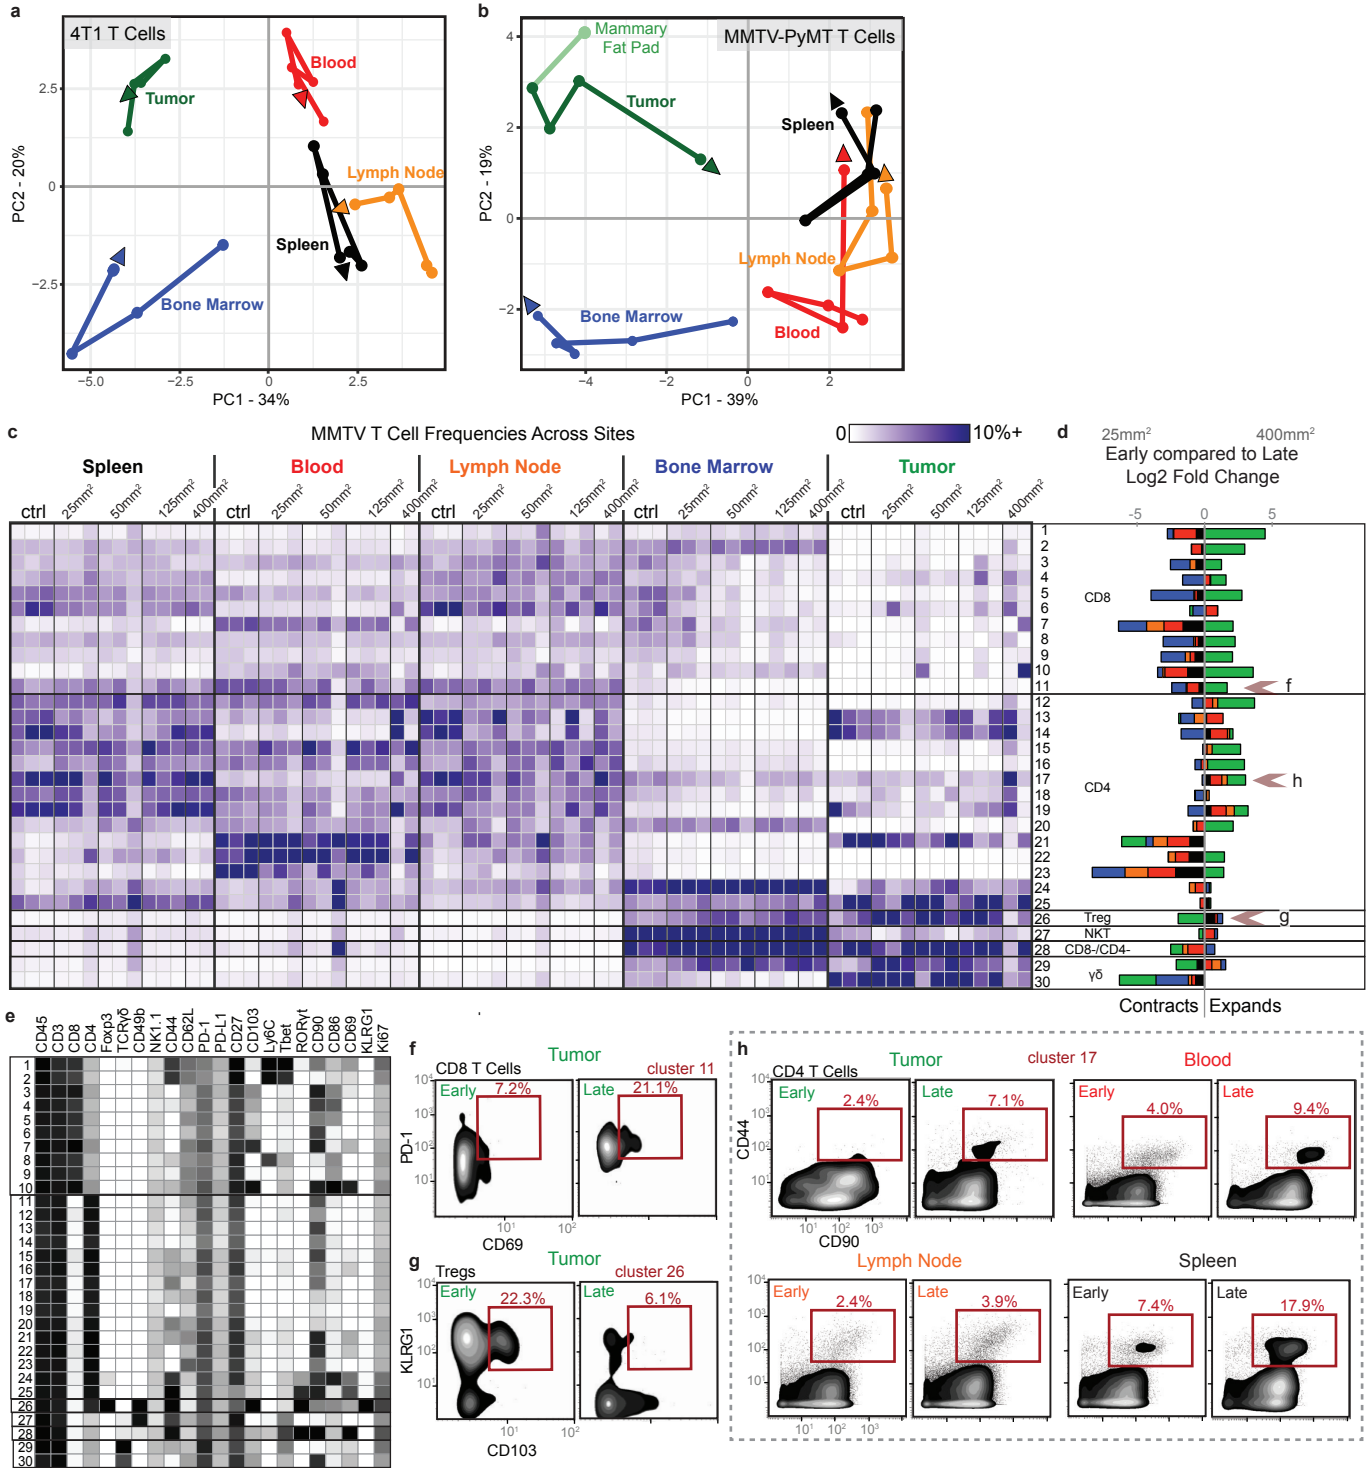

**Extended Data Fig. 5: Tumor growth shifts the systemic mononuclear phagocyte composition.**

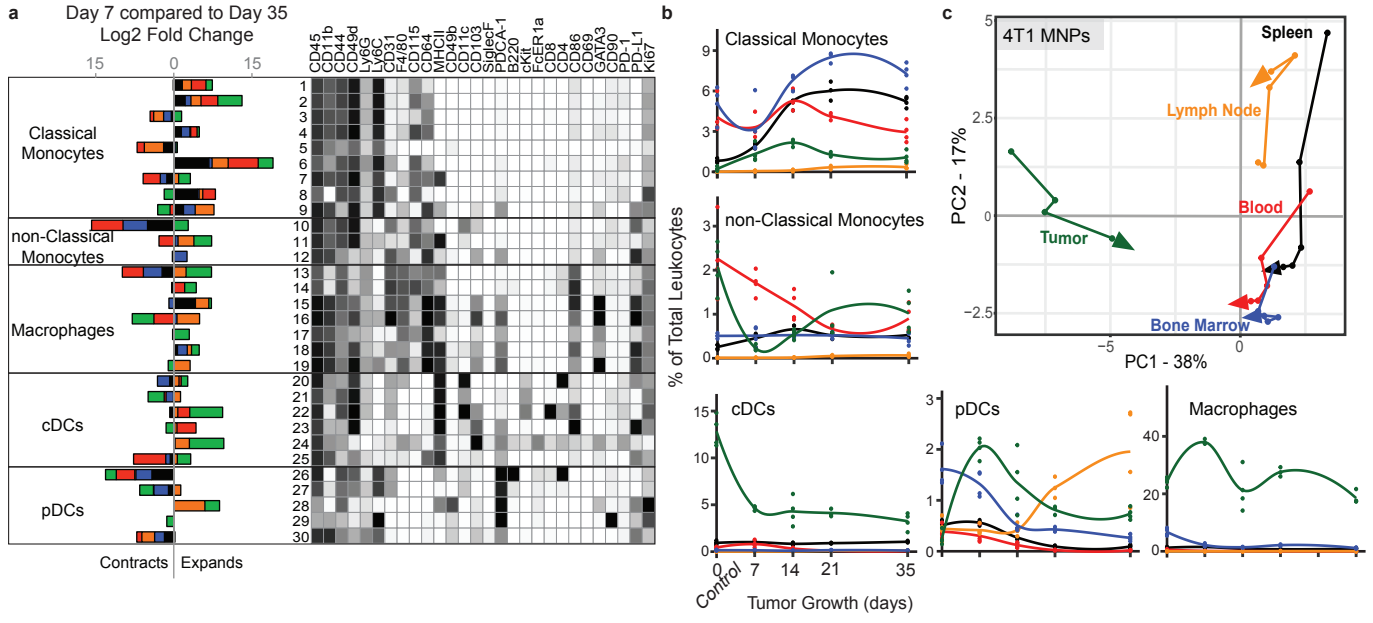

**Extended Data Fig. 6: PD-1 and PD-L1 expression is dynamic over tumor growth.**

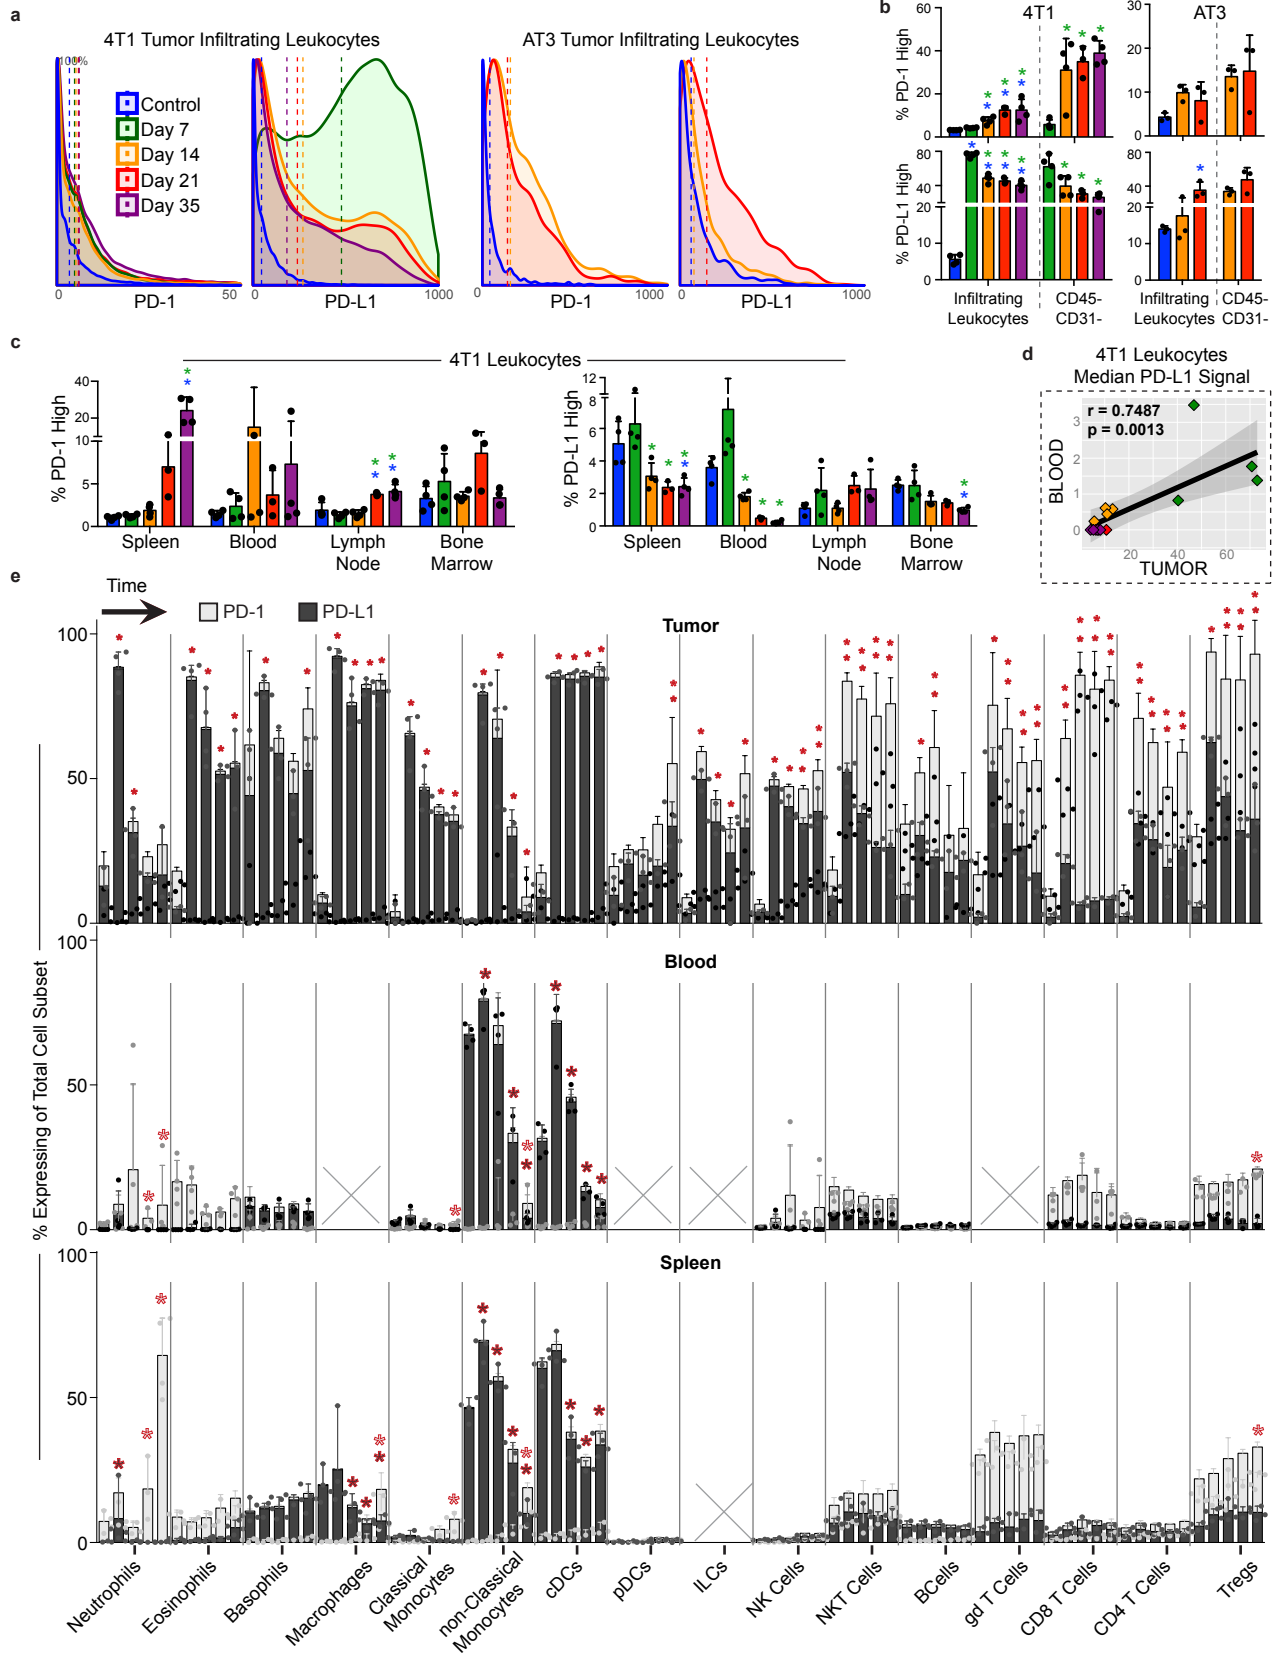

**Extended Data Fig. 8: Tumor burden induces organ-specific changes in immune cell cycling.**

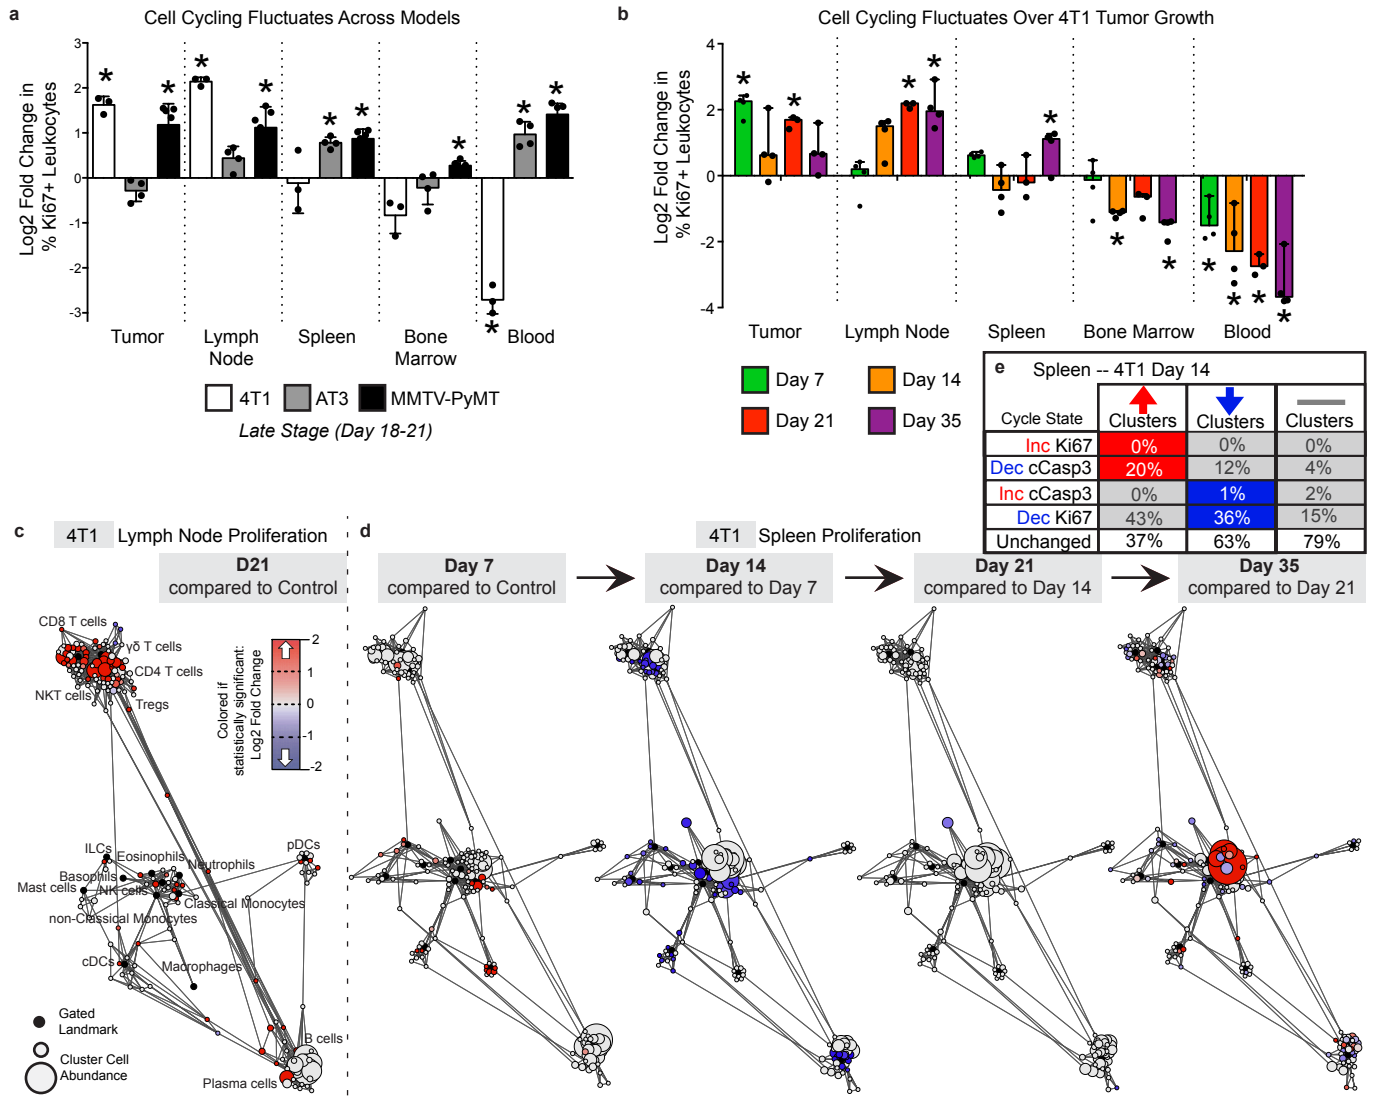

**Extended Fig. 8: Tumor driven deficits in T cell responses are cell-extrinsic.**

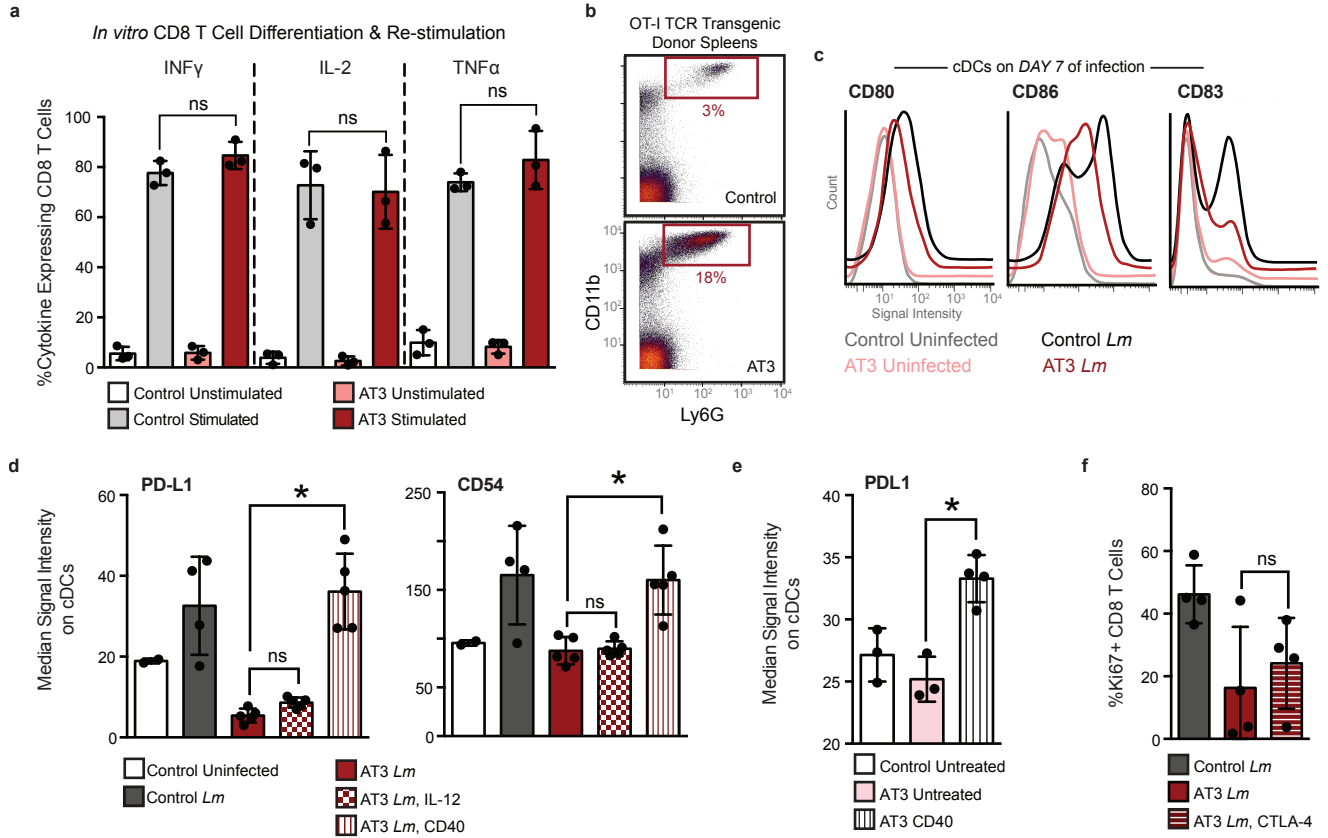



**Extended Data Fig. 9: Tumor resection resets systemic immune organization and function.**

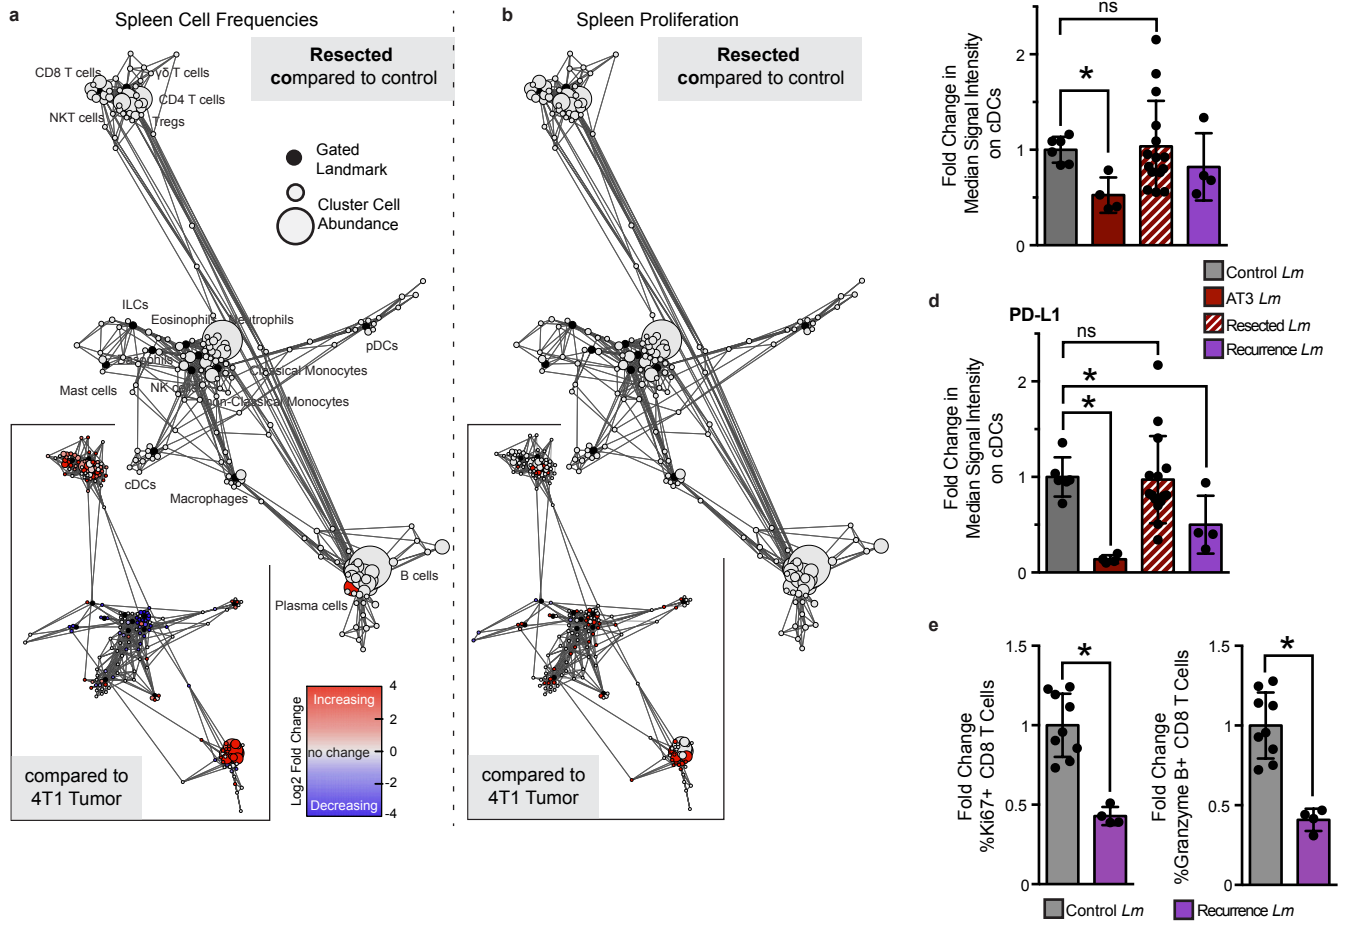

Supplement: Supplementary file [file media-1.pdf]
